# Supplementary material for: Distinct Upstream Role of Type I IFN Signaling in Hematopoietic Stem Cell-Derived and Epithelial Resident Cells for Concerted Recruitment of Ly-6Chi Monocytes and NK Cells via CCL2-CCL3 Cascade
Source: PubMed Central journal article supplement (PMC4664252; doi:10.1371/journal.ppat.1005256), 2015-11-30
Supplement: ppat.1005256.s002.pdf [file ppat.1005256.s002.pdf]

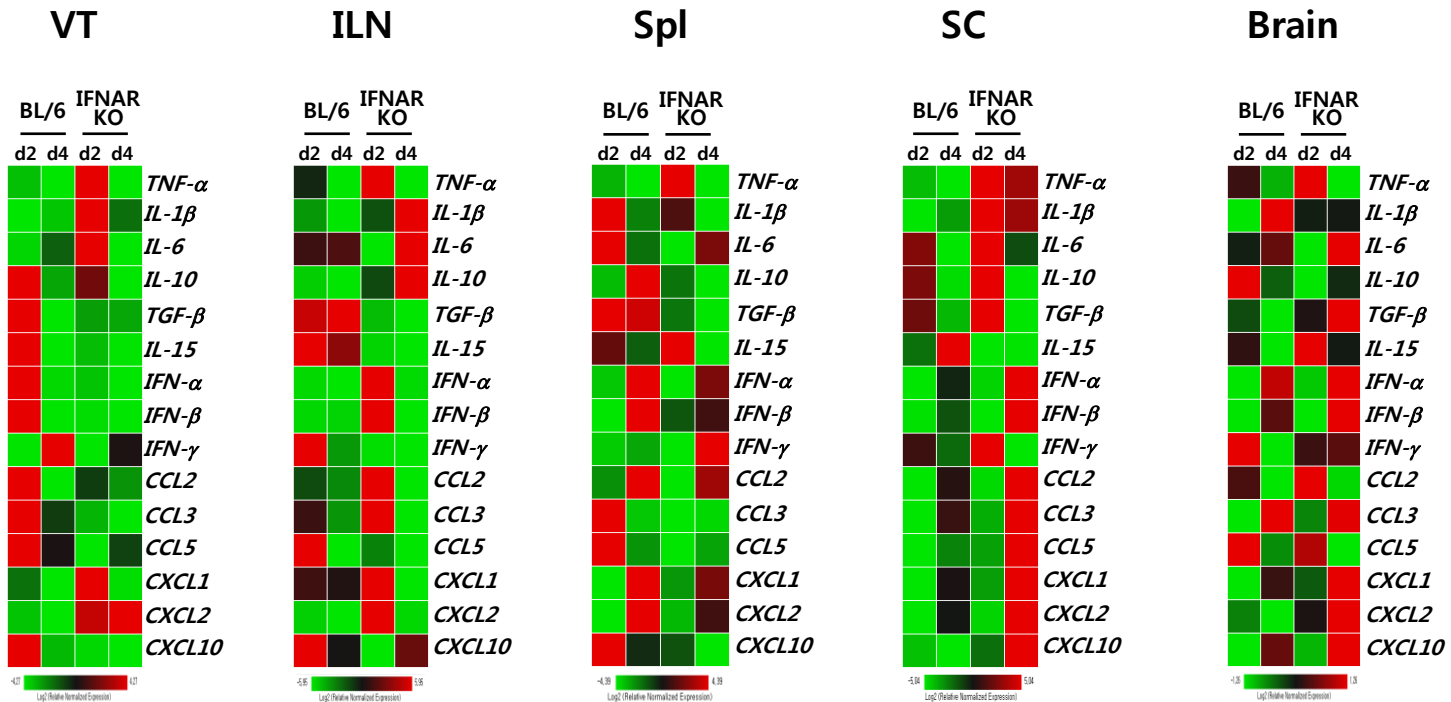

**S2 Fig. IFN-I signaling is essential to establish early orchestrated expression of cytokines and chemokines in primary inflammation tissues.** Heatmap showing the expression of cytokines and chemokines in each tissue. The expression levels of cytokines and chemokines were assessed by real-time qRT-PCR using total RNA extracted from vaginal tract (VT), iliac LN (ILN), spleen (Spl), spinal cord (SC), and brain of infected BL/6 or *IFNAR* KO mice at the indicated dpi. The expression of each cytokine and chemokine is normalized to that of  $\beta$ -actin and is displayed as the average of three individual experiments ( $n=4-5$ ), according to the indicated color on a log<sub>2</sub> scale.
