# Supplementary material for: Distinct Upstream Role of Type I IFN Signaling in Hematopoietic Stem Cell-Derived and Epithelial Resident Cells for Concerted Recruitment of Ly-6Chi Monocytes and NK Cells via CCL2-CCL3 Cascade
Source: PubMed Central journal article supplement (PMC4664252; doi:10.1371/journal.ppat.1005256), 2015-11-30
Supplement: ppat.1005256.s003.pdf [file ppat.1005256.s003.pdf]

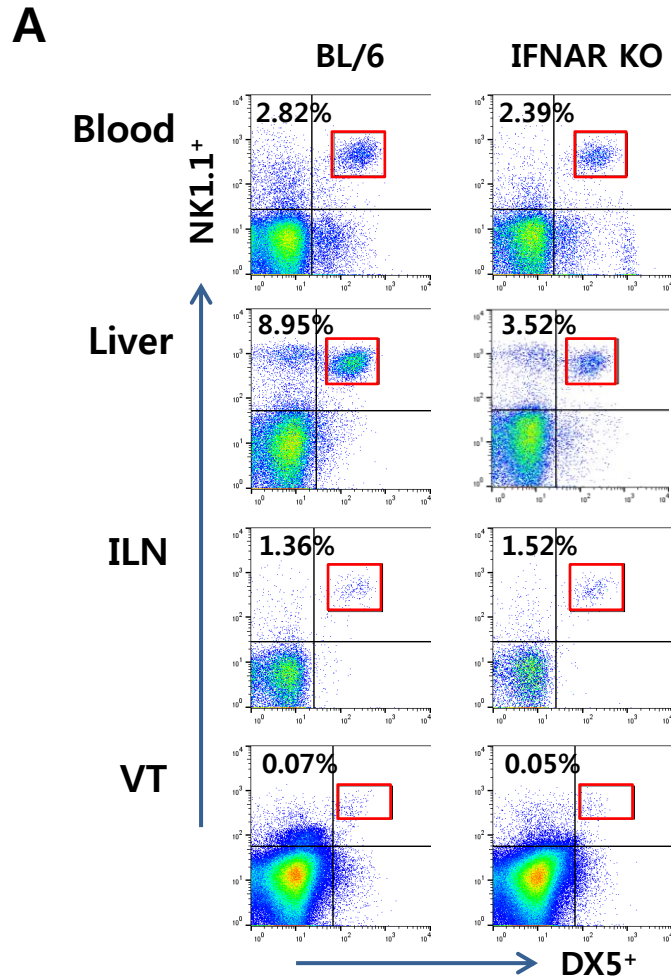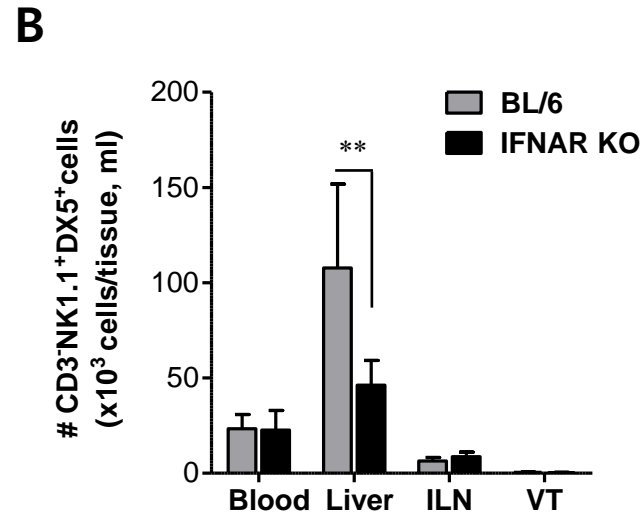

**S3 Fig. Effect of IFN-I signaling on the differentiation of NK cells in various tissues.** Uninfected BL/6 or *IFNAR* KO mice were sacrificed and leukocytes were prepared for the analysis of CD3<sup>-</sup>NK1.1<sup>+</sup>DX5<sup>+</sup> NK cells in various tissues including blood, liver, ILN (iliac LN), and vaginal tract (VT). (A) NK cell frequency. (B) Total number of CD3<sup>-</sup>NK1.1<sup>+</sup>DX5<sup>+</sup> NK cells in each tissue. Values in dot-plots represent the average percentages of CD3<sup>-</sup>NK1.1<sup>+</sup>DX5<sup>+</sup> NK cells after gating on CD3-negative cells. Data in bar charts represent the average ± SD derived from three individual experiments ( $n=5$ ). \*\*,  $p < 0.01$  compared with the levels of *IFNAR* KO mice.
