# Supplementary material for: Distinct Upstream Role of Type I IFN Signaling in Hematopoietic Stem Cell-Derived and Epithelial Resident Cells for Concerted Recruitment of Ly-6Chi Monocytes and NK Cells via CCL2-CCL3 Cascade
Source: PubMed Central journal article supplement (PMC4664252; doi:10.1371/journal.ppat.1005256), 2015-11-30
Supplement: ppat.1005256.s004.pdf [file ppat.1005256.s004.pdf]

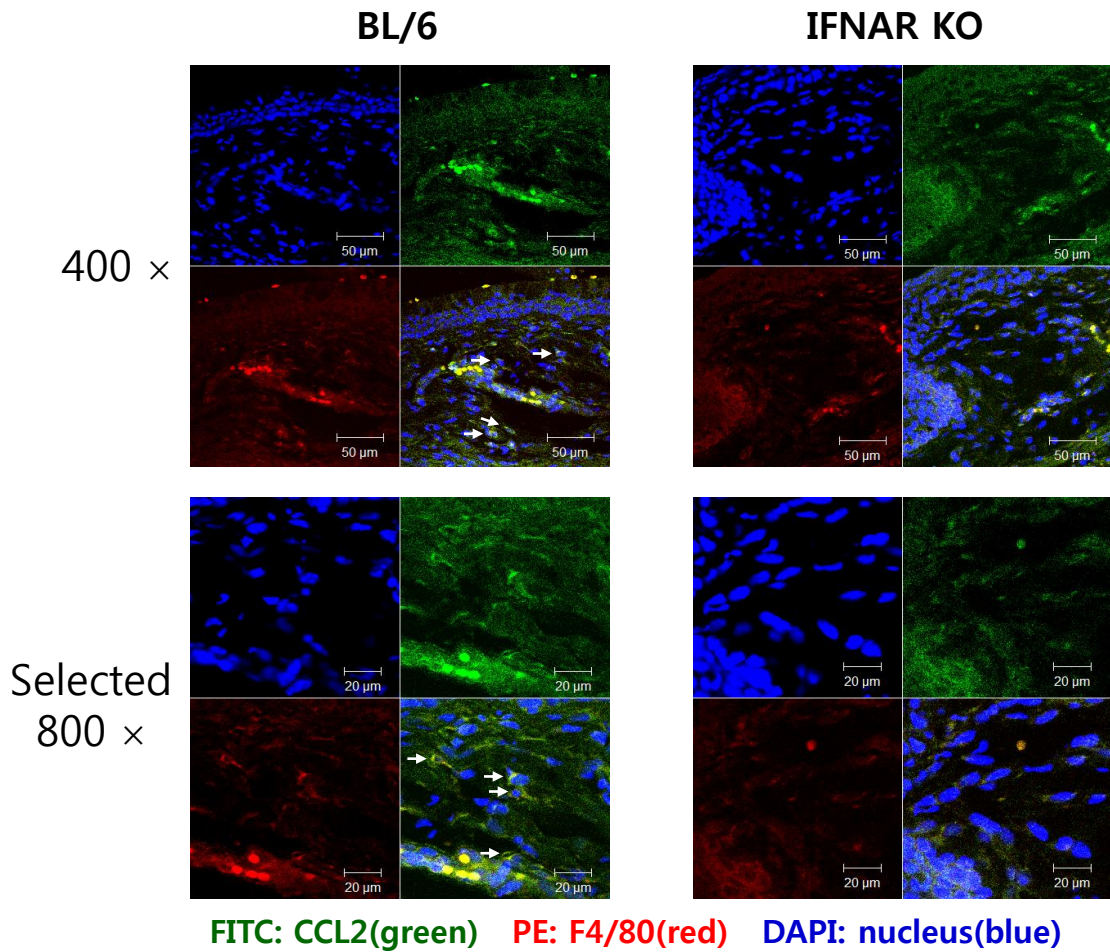

**S4 Fig. Confocal microscopic analysis of early CCL2 production by resident F4/80<sup>+</sup> macrophages.** Resident F4/80<sup>+</sup> macrophages producing CCL2 protein were visualized by confocal microscopy at 12 h pi. F4/80<sup>+</sup> macrophages producing CCL2 protein are denoted by white arrows.
