# Supplementary material for: Distinct Upstream Role of Type I IFN Signaling in Hematopoietic Stem Cell-Derived and Epithelial Resident Cells for Concerted Recruitment of Ly-6Chi Monocytes and NK Cells via CCL2-CCL3 Cascade
Source: PubMed Central journal article supplement (PMC4664252; doi:10.1371/journal.ppat.1005256), 2015-11-30
Supplement: ppat.1005256.s006.pdf [file ppat.1005256.s006.pdf]

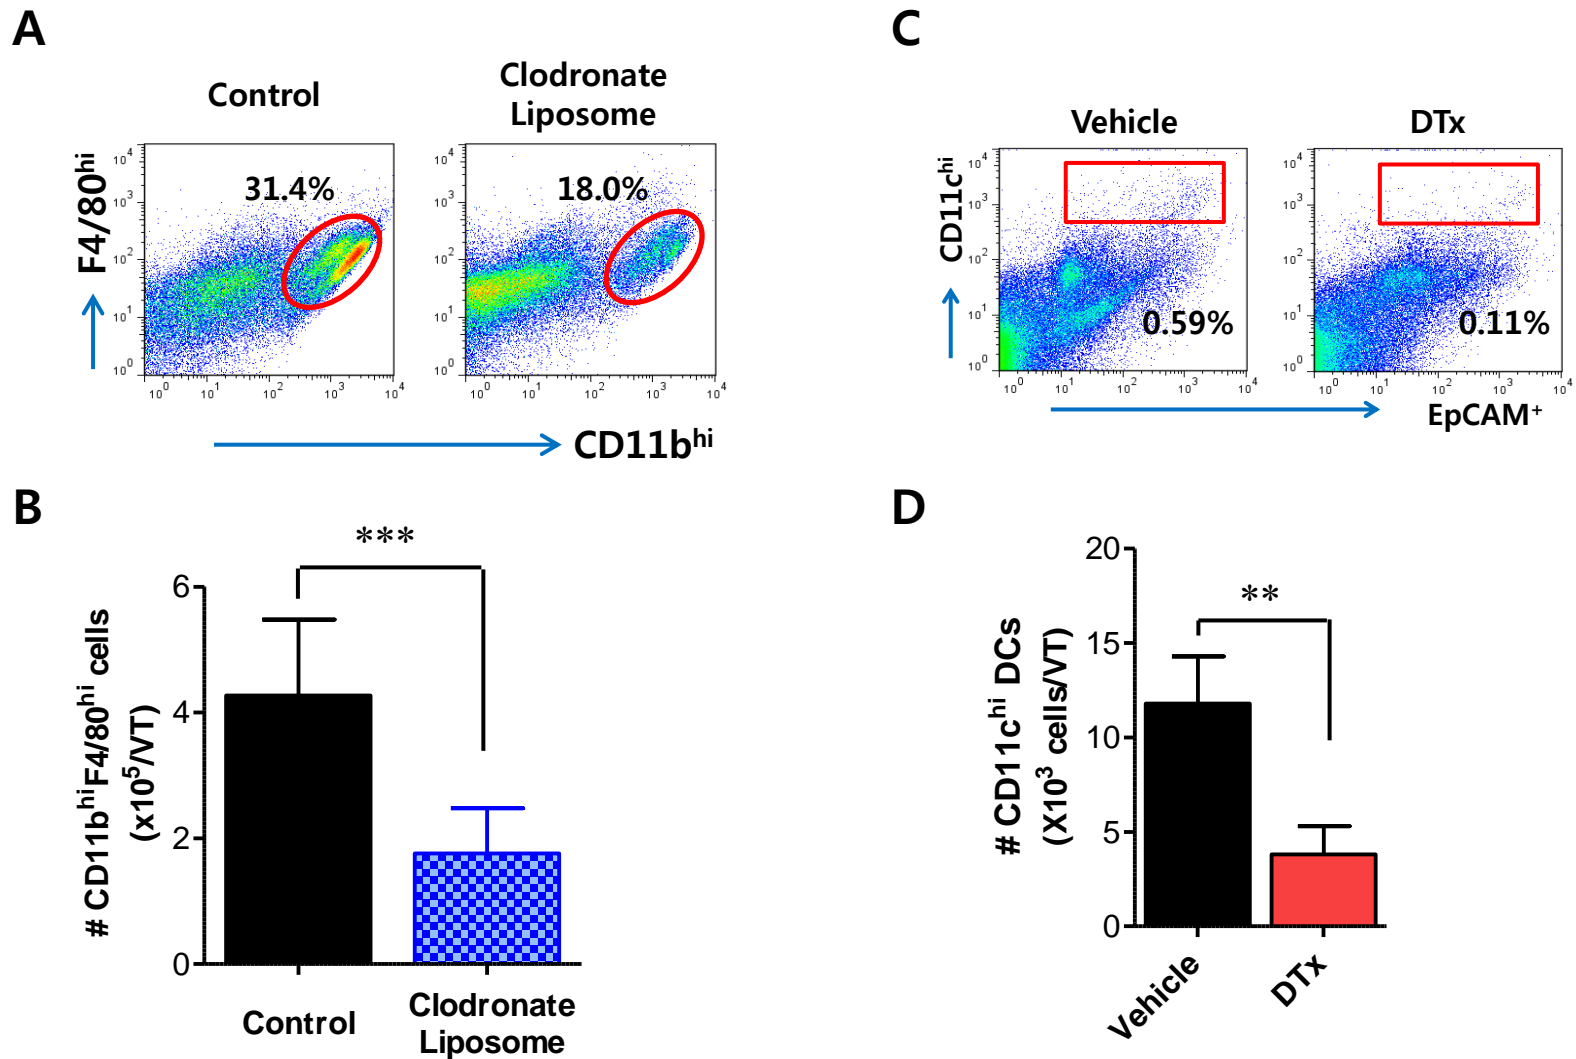

**S6 Fig. Depletion of CD11b<sup>hi</sup>F4/80<sup>hi</sup> macrophages and CD11c<sup>hi</sup> DCs.** (A and B) BL/6 mice were treated with clodronate liposomes via both intravenous (i.v.) and i.vag. routes. Resident CD11b<sup>hi</sup>F4/80<sup>hi</sup> macrophages in vaginal tract were determined by flow cytometric analysis 24 h after clodronate treatment. (C and D) CD11c-DTR Tg mice were administered DT via both intraperitoneal (i.p.) and i.vag. routes. Resident CD11c<sup>hi</sup> DCs were determined by flow cytometric analysis 24 h after DT treatment. Values in the representative dot-plots denote the average percentages of vaginal macrophages and DCs derived from at least four independent samples, and data in the bar chart represent the average  $\pm$  SD derived from three individual experiments ( $n=4-5$ ). \*\*,  $p < 0.01$ ; \*\*\*,  $p < 0.001$  compared with the levels of the indicated group.
