# Supplementary material for: Distinct Upstream Role of Type I IFN Signaling in Hematopoietic Stem Cell-Derived and Epithelial Resident Cells for Concerted Recruitment of Ly-6Chi Monocytes and NK Cells via CCL2-CCL3 Cascade
Source: PubMed Central journal article supplement (PMC4664252; doi:10.1371/journal.ppat.1005256), 2015-11-30
Supplement: ppat.1005256.s008.pdf [file ppat.1005256.s008.pdf]

**S1 Table.** Specific primers for PCR amplification of cytokines and chemokines.

| <b>Target gene</b>              |   | <b>Primer sequence (5'-3')<sup>b</sup></b> | <b>Position cDNA</b> | <b>Gene Bank ID</b> |
|---------------------------------|---|--------------------------------------------|----------------------|---------------------|
| <b>TNF-<math>\alpha</math></b>  | F | CGT CGT AGC AAA CCA CCA AG                 | 438-457              | NM_013693           |
|                                 | R | TTG AAG AGA ACC TGG GAG TAG ACA            | 564-587              |                     |
| <b>IL-1<math>\beta</math></b>   | F | TCC AAG AAA GGA CGA ACA TTC G              | 535-559              | NM_008361           |
|                                 | R | TGA GGA CAT CTC CCA CGT CAA                | 679-700              |                     |
| <b>IL-6</b>                     | F | TGG GAA ATC GTG GAA ATG AG                 | 209-228              | NM_031168           |
|                                 | R | CTC TGA AGG ACT CTG GCT TTG                | 442-462              |                     |
| <b>IL-10</b>                    | F | CAA CAT ACT GCT AAC CGA CTC CT             | 1-24                 | NM_010548.1         |
|                                 | R | TGA GGG TCT TCA GCT TCT CAC                | 24-44                |                     |
| <b>TGF-<math>\beta</math></b>   | F | GTG TGG AGC AAC ATG TGG AAC TCT            | 1-24                 | NM_011577.1         |
|                                 | R | TTG GTT CAG CCA CTG CCG TA                 | 25-44                |                     |
| <b>IL-15</b>                    | F | ACA TCC TAC TCG TGC TAC TTG TG             | 106-121              | NM_008357.1         |
|                                 | R | CAT TGC AGT AAC TTT GCA ACT GG             | 399-419              |                     |
| <b>IFN-<math>\alpha</math></b>  | F | TGT CTG ATG CAG CAG GTG G                  | 367-385              | NM_008334.3         |
|                                 | R | AAG ACA GGG CTC TCC AGA C                  | 514-532              |                     |
| <b>IFN-<math>\beta</math></b>   | F | TCC AAG AAA GGA CGA ACA TTC G              | 106-121              | NM_010510           |
|                                 | R | TGA GGA CAT CTC CCA CGT CAA                | 399-419              |                     |
| <b>IFN-<math>\gamma</math></b>  | F | CAG CAA CAA CAT AAG CGT CA                 | 119-220              | NM_008337.3         |
|                                 | R | CCT CAA ACT TGG CAA TAC TCA                |                      |                     |
| <b>CCL2</b>                     | F | AAA AAC CTG GAT CGG AAC CAA                | 347-367              | NM_011333           |
|                                 | R | CGG GTC AAC TTC ACA TTC AAA G              | 426-447              |                     |
| <b>CCL3</b>                     | F | CCA AGT CTT CTC AGC GCC AT                 | 158-177              | NM_011337.2         |
|                                 | R | GAA TCT TCC GGC TGT AGG AGA AG             | 206-228              |                     |
| <b>CCL4</b>                     | F | TTC TGT GCT CCA GGG TTC TC                 | 128-147              | NM_013652.2         |
|                                 | R | GAG GAG GCC TCT CCT GAA GT                 | 388-407              |                     |
| <b>CCL5</b>                     | F | CCC TCA CCA TCA TCC TCA CT                 | 77-96                | NM_009917           |
|                                 | R | CTT CTT CTC TGG GTT GGC AC                 | 275-294              |                     |
| <b>CXCL1</b>                    | F | CGC TGC TGC TGC TGG CCA CC                 | 158-177              | NM_008176.2         |
|                                 | R | GGC TAT GAC TTC GGT TTG GG                 | 206-228              |                     |
| <b>CXCL2</b>                    | F | ATC CAG AGC TTG AGT GTG ACG C              | 77-96                | NM_009140.2         |
|                                 | R | AAG GCA AAC TTT TTG ACC GCC                | 275-294              |                     |
| <b>CXCL10</b>                   | F | AAG TGC TGC CGT CAT TTT CT                 | 347-367              | NM_021274.1         |
|                                 | R | CAT TCT TTT TCA TCG TGG CA                 | 426-447              |                     |
| <b><math>\beta</math>-actin</b> | F | TGG AAT CCC TGT GGG ACC ATG AAA C          | 128-147              | NM_007393.3         |
|                                 | R | TAA AAC GCA GCT CAG TAA CAG TCC G          | 388-407              |                     |

<sup>a</sup>IL, interleukin; TNF- $\alpha$ , tumor necrosis factor-  $\alpha$ ; IFN, interferon; CCL, (C-C motif) ligand; CXCL, (C-X-C motif) ligand

<sup>b</sup>F, forward primer; R, reverse primer
